# Supplementary material
Source: publisher site journal article supplement (https://www.dovepress.com/article/559801)
Supplement: Supplementary file 1 [file 559801%20Supplementary%20materials.docx]

**
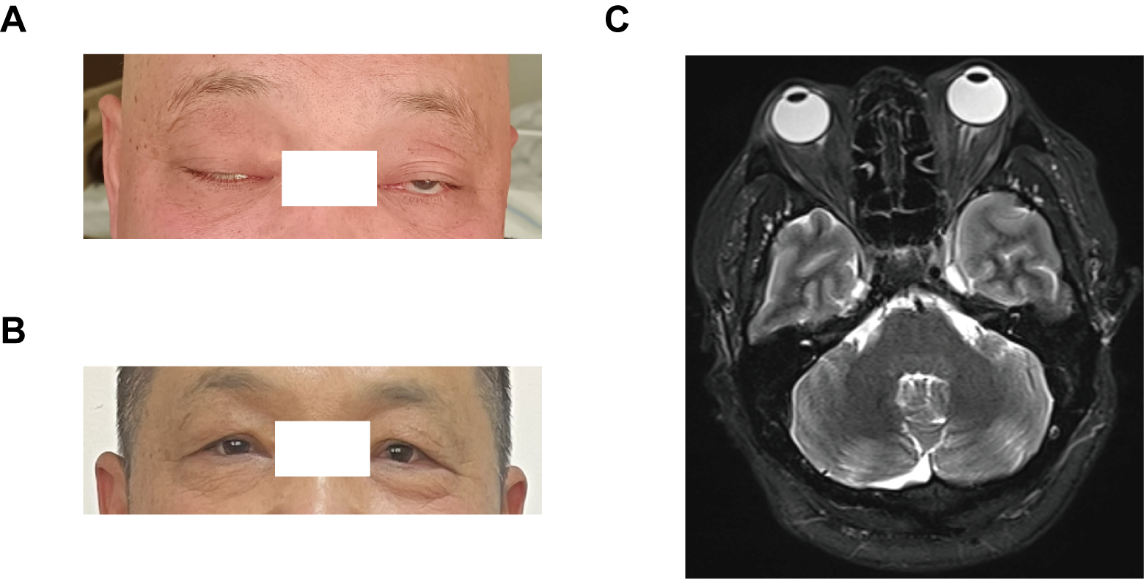
**

**Figure S1.** Evolution of bilateral ptosis following immunotherapy. **(A)** Presentation at 7 days post-immunotherapy. **(B)** Significant improvement 7.2 months after initiating corticosteroid treatment. **(C)** Ocular MRI showed no abnormal muscle signals.


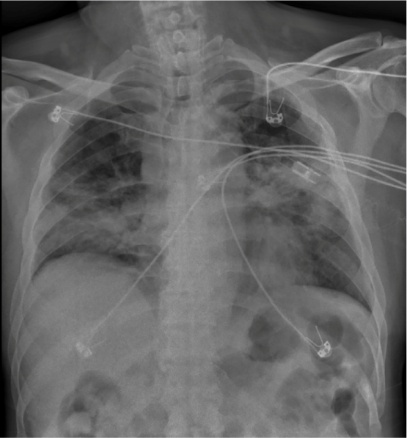


**Figure S2.** Chest X-ray pneumonia image day 2 after radiotherapy.
